# Supplementary material
Source: publisher figshare collection journal article supplement (https://acs.figshare.com/ndownloader/files/13805882)
Supplement: Supplementary file 1 [file 13805882]

## Supporting Information

# Modification of CO<sub>2</sub> Reduction Activity of Nanostructured Silver Electrocatalysts by Surface Halide Anions

Yu-Chi Hsieh, Luis E. Betancourt, Sanjaya D. Senanayake, Enyuan Hu, Yu Zhang, Wenqian Xu<sup>†</sup>,  
and Dmitry E. Polyansky\*

Chemistry Division, Brookhaven National Laboratory, Upton, New York 11973-5000, United  
States

\*E-mail: dep@bnl.gov

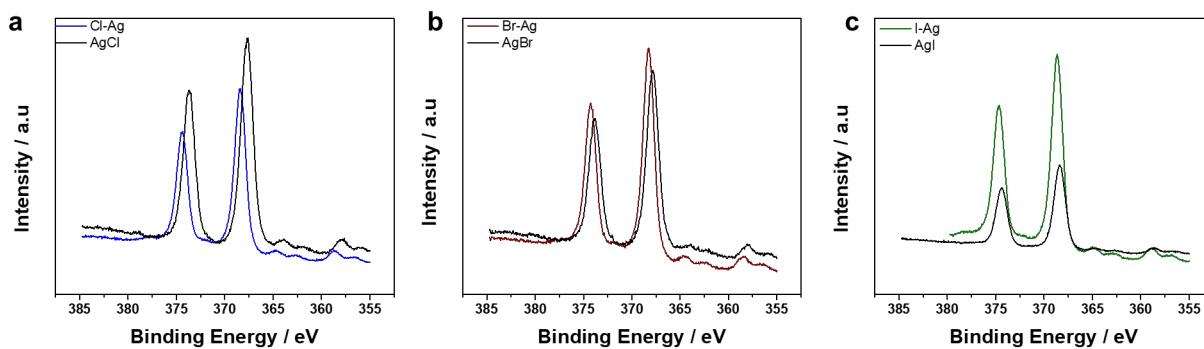

**Figure S1.** XPS spectra featuring Ag  $3d_{5/2}$  and Ag  $3d_{3/2}$  peaks and comparing AgX and X-Ag samples. (a) X = Cl (b) X = Br and (c) X = I.

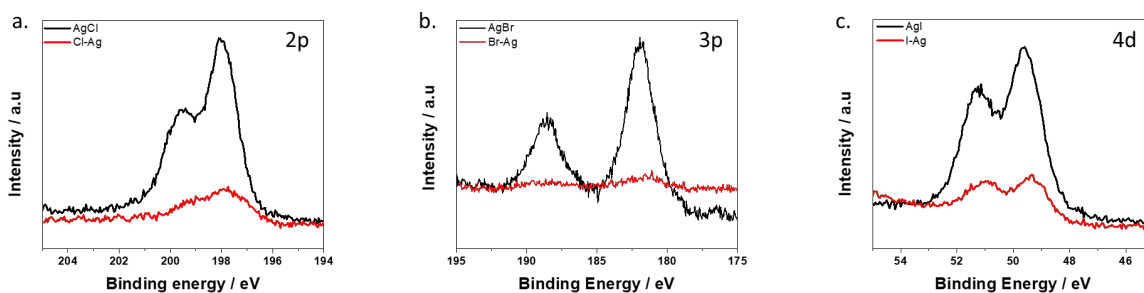

**Figure S2.** XPS spectra comparing AgX and X-Ag samples. (a) X = Cl, Cl 2p (b) X = Br, Br 3p and (c) X = I, I 4d.

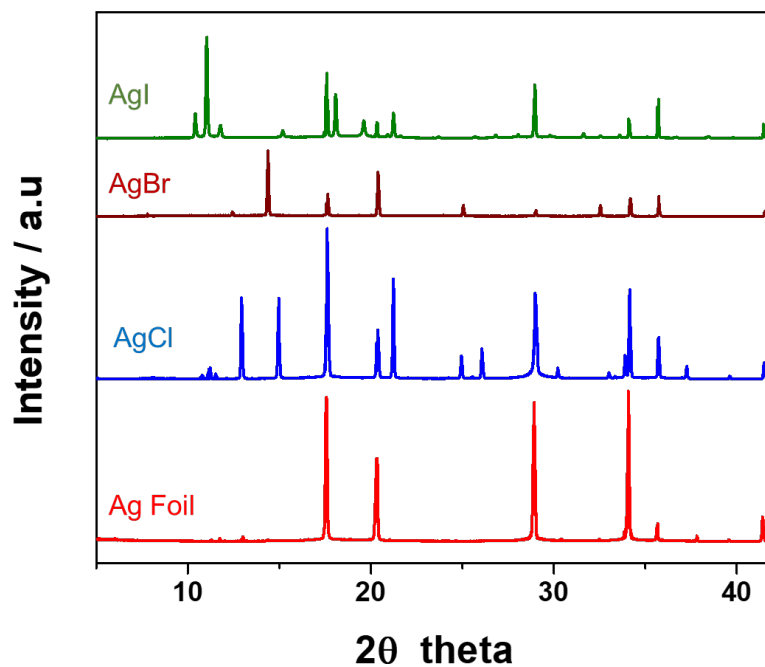

**Figure S3.** X-ray diffractograms of Ag foil (red), and AgX obtained after the oxidation treatment of Ag foil. AgCl (blue), AgBr (brown) and AgI (green) respectively.  $\lambda = 0.72768 \text{ \AA}$ .

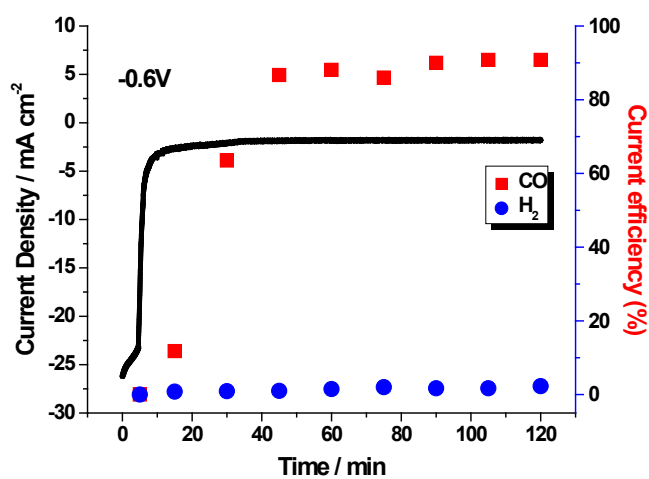

**Figure S4.** Total current density (left axis) and current efficiencies (right axis) for the formation of CO (red squares) and H<sub>2</sub> (blue circles) as a function of time using as-prepared AgCl, measured in CO<sub>2</sub>-saturated 0.1 M KHCO<sub>3</sub> at -0.6 V (vs. RHE). The potential of -0.6 V reported for as-prepared AgCl samples is not *i*R-corrected, due to the strong influence of the released Cl<sup>-</sup> on the solution resistance.

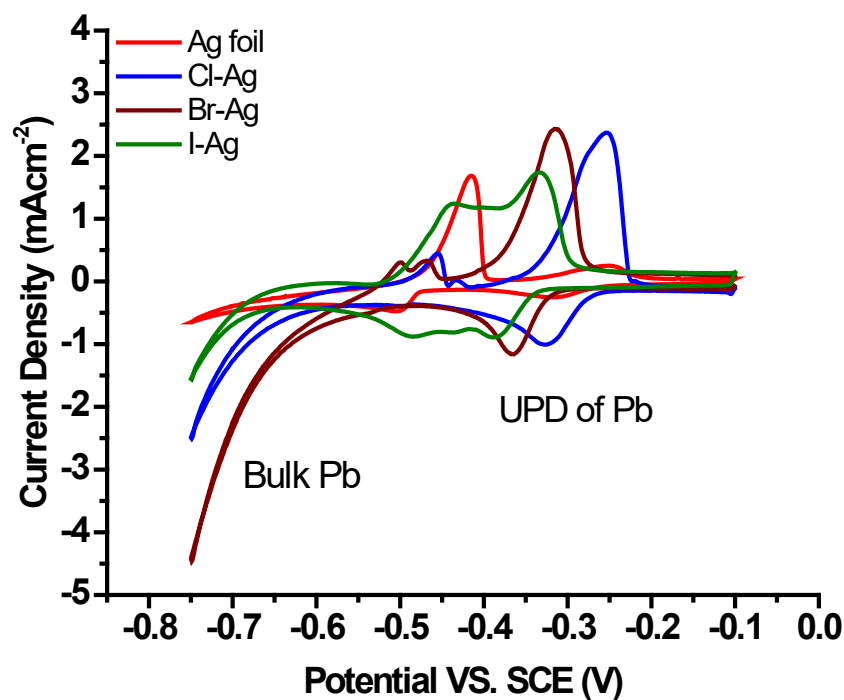

**Figure S5.** Lead (Pb) underpotential deposition (UPD) and bulk deposition, in 1 mM Pb(acetate)<sub>2</sub> + 1 mM HClO<sub>4</sub> + 0.5 M NaClO<sub>4</sub> solution, at the sweep rate of 10 mV s<sup>-1</sup>, in the same potential range, for Ag foil (red), Cl-Ag (blue), Br-Ag (wine) and I-Ag (green) samples. The electrochemically active surface area determined by Pb UPD measurements is 2 cm<sup>2</sup> for Ag foil, 19.2 cm<sup>2</sup> for I-Ag, 41 cm<sup>2</sup> for Br-Ag and 40.8 cm<sup>2</sup> for Cl-Ag.
